# Supplementary material for: Proteolytic activation of both components of the cation stress–responsive Slt pathway in Aspergillus nidulans
Source: PubMed Central journal article supplement — Mol Biol Cell. 2016 Aug 15;27(16):2598–612. doi: 10.1091/mbc.E16-01-0049 (PMC4985261; doi:10.1091/mbc.e16-01-0049), 2016-08-15
Supplement: supp_E16-01-0049v1_CombinedSupMats.pdf [file supp_E16-01-0049v1_CombinedSupMats.pdf]

# Supplemental Materials

*Molecular Biology of the Cell*

Mellado et al.

**Supplemental Table S1.** List of strains used in this work

| Strain  | Genotype                                                                                                                                       | Reference                            |
|---------|------------------------------------------------------------------------------------------------------------------------------------------------|--------------------------------------|
| MAD1425 | <i>pyrG89, pyroA4, nkuAΔ::argB (argB2)</i>                                                                                                     | (TN02A3, Nayak et al., (2006))       |
| MAD1427 | <i>pyrG89, pabaB22, nkuAΔ::argB (argB2), riboB2</i>                                                                                            | Markina-Iñarrairaegui et al., (2011) |
| MAD2457 | <i>pyrG89, wA3, cnaAΔ::pyroA, pyroA4</i>                                                                                                       | CNA1, Soriani et al., (2008)         |
| MAD2733 | <i>pabaB22, nkuAΔ::argB (argB2)</i>                                                                                                            | Markina-Iñarrairaegui et al. 2011    |
| MAD2743 | <i>yA2, pyroA4, pantoB100</i>                                                                                                                  | Zhang et al., (2011)                 |
| MAD3625 | <i>pyrG89, sltB::gfp::pyrG<sup>Af</sup>, pabaB22, nkuAΔ::argB (argB2), riboB2</i>                                                              | This work                            |
| MAD3626 | <i>pyrG89, pabaB22, nkuAΔ::argB (argB2), sltAΔ::pyrG<sup>Af</sup>, riboB2</i>                                                                  | This work                            |
| MAD3650 | <i>pyrG89, sltB::gfp::pyrG<sup>Af</sup>, pabaB22, nkuAΔ::argB (argB2)</i>                                                                      | This work                            |
| MAD3651 | <i>pyrG89, pabaB22, nkuAΔ::argB (argB2), sltAΔ::pyrG<sup>Af</sup></i>                                                                          | Mellado et al. (2015)                |
| MAD3652 | <i>pyrG89, pabaB22, nkuAΔ::argB (argB2), sltA::ha<sub>3</sub>::pyrG<sup>Af</sup>, riboB2</i>                                                   | This work                            |
| MAD3669 | <i>pyrG89, sltBΔ::riboB<sup>Af</sup>, pabaB22, nkuAΔ::argB (argB2), riboB2</i>                                                                 | Mellado et al., (2015)               |
| MAD3682 | <i>sltBΔ::riboB<sup>Af</sup>, pabaB22, nkuAΔ::argB (argB2), riboB2</i>                                                                         | Mellado et al., (2015)               |
| MAD3693 | <i>pyrG89, sltBΔ::riboB<sup>Af</sup>, pabaB22, nkuAΔ::argB (argB2), sltA::ha<sub>3</sub>::pyrG<sup>Af</sup>, riboB2</i>                        | This work                            |
| MAD3694 | <i>pyrG89, sltB<sup>1-590</sup>::ha<sub>3</sub>::pyrG<sup>Af</sup>, pabaB22, nkuAΔ::argB (argB2), riboB2</i>                                   | This work                            |
| MAD3705 | <i>pyrG89, sltB::gfp::pyrG<sup>Af</sup>, pabaB22, nkuAΔ::argB (argB2), sltAΔ::riboB<sup>Af</sup>, riboB2</i>                                   | This work                            |
| MAD3710 | <i>pyrG89, sltB<sup>692-1272</sup>::myc<sub>3</sub>::pyrG<sup>Af</sup>, pabaB22, nkuAΔ::argB (argB2), riboB2</i>                               | This work                            |
| MAD3711 | <i>pyrG89, sltB<sup>692-1272</sup>::gfp::pyrG<sup>Af</sup>, pabaB22, nkuAΔ::argB (argB2), riboB2</i>                                           | This work                            |
| MAD3734 | <i>pyrG89, sltB::myc<sub>3</sub>::pyrG<sup>Af</sup>, pabaB22, nkuAΔ::argB (argB2), riboB2</i>                                                  | This work                            |
| MAD3750 | <i>pyrG89, sltB<sup>692-1272</sup>::gfp::riboB<sup>Af</sup>, pabaB22, nkuAΔ::argB (argB2), sltA::ha<sub>3</sub>::pyrG<sup>Af</sup>, riboB2</i> | This work                            |
| MAD3751 | <i>pyrG89, sltB::gfp::riboB<sup>Af</sup>, pabaB22, nkuAΔ::argB (argB2), sltA::ha<sub>3</sub>::pyrG<sup>Af</sup>, riboB2</i>                    | This work                            |
| MAD3770 | <i>sltB53, pabaA1, yA2, pyroA4</i>                                                                                                             | Mellado et al., (2015)               |
| MAD3815 | <i>pyrG89, sltB<sup>1-590</sup>::gfp::riboB<sup>Af</sup>, pabaB22, nkuAΔ::argB (argB2), sltA::ha<sub>3</sub>::pyrG<sup>Af</sup>, riboB2</i>    | This work                            |
| MAD3816 | <i>pyrG89, pyroA4, nkuAΔ::argB (argB2), sltAΔ::pyrG<sup>Af</sup></i>                                                                           | This work                            |
| MAD3915 | <i>pabaB22, nkuAΔ::argB (?), cnaAΔ::pyroA<sup>Af</sup>, sltA::ha<sub>3</sub>::pyrG<sup>Af</sup></i>                                            | This work                            |

|         |                                                                                                                                                                                          |                               |
|---------|------------------------------------------------------------------------------------------------------------------------------------------------------------------------------------------|-------------------------------|
| MAD3919 | <i>pyrG89, pabaB22, nkuAΔ::argB (argB2), sltAΔ::riboB<sup>Af</sup>, riboB2</i>                                                                                                           | Mellado et al., (2015)        |
| MAD3934 | <i>sltB56, nkuAΔ::BAR(?), nkuAΔ::argB(?), sltA::ha<sub>3</sub>::pyrG<sup>Af</sup>, riboB2</i>                                                                                            | This work                     |
| MAD4013 | <i>pyrG89, sltB53::gfp::pyrG<sup>Af</sup>, biA1, nkuAΔ::BAR(?), pantoB100</i>                                                                                                            | This work                     |
| MAD4015 | <i>nkuAΔ::argB (argB2), pyroA-[alcA<sup>P</sup>::sltB::myc<sub>3</sub>]<sub>1x</sub>, sltAΔ::pyrG<sup>Af</sup>, riboB2</i>                                                               | This work                     |
| MAD4016 | <i>nkuAΔ::argB (argB2), pyroA-[alcA<sup>P</sup>::sltB::myc<sub>3</sub>]<sub>nx</sub>, sltAΔ::pyrG<sup>Af</sup>, riboB2</i>                                                               | This work                     |
| MAD4025 | <i>pyrG89, pabaB22, nkuAΔ::argB (argB2), sltA<sup>200-698</sup>::ha<sub>3</sub>::pyrG<sup>Af</sup>, riboB2</i>                                                                           | This work                     |
| MAD4026 | <i>pyrG89, pabaB22, nkuAΔ::argB (argB2), sltA<sup>331-698</sup>::ha<sub>3</sub>::pyrG<sup>Af</sup>, riboB2</i>                                                                           | This work                     |
| MAD4048 | <i>pyrG89, pabaA1, sltA1</i>                                                                                                                                                             | This work                     |
| MAD4080 | <i>pyrG89, sltB::gfp::riboB<sup>Af</sup>, pabaB22, nkuAΔ::argB (argB2), sltA<sup>331-698</sup>::ha<sub>3</sub>::pyrG<sup>Af</sup>, riboB2</i>                                            | This work                     |
| MAD4081 | <i>pyrG89, pabaB22, nkuAΔ::argB (argB2), sltA<sup>331-698</sup>::ha<sub>3</sub>::pyrG<sup>Af</sup>, riboB2</i>                                                                           | This work                     |
| MAD4096 | <i>Prototrophic wild type</i>                                                                                                                                                            | HHF27a, Findon et al., (2010) |
| MAD4097 | <i>sltAΔ::riboB<sup>Af</sup></i>                                                                                                                                                         | HHF27b, Findon et al., (2010) |
| MAD4247 | <i>pyrG89, sltB::gfp::pyrG<sup>Af</sup>, pabaA1, sltA1</i>                                                                                                                               | This work                     |
| MAD4294 | <i>pyrG89, pabaB22, nkuAΔ::argB (argB2), thiA<sup>P</sup>::sltA::ha<sub>3</sub>::pyrG<sup>Af</sup>, riboB2</i>                                                                           | This work                     |
| MAD4362 | <i>pyrG89, sltB<sup>1-477</sup>::gfp::riboB<sup>Af</sup>, pabaB2, nkuAΔ::argB (argB2), riboB2</i>                                                                                        | This work                     |
| MAD4443 | <i>pyrG89, sltB57::gfp::riboB<sup>Af</sup>, pabaB22, sltA::ha<sub>3</sub>::pyrG<sup>Af</sup>, nkuAΔ::argB<sup>+</sup>(argB2), riboB2</i>                                                 | This work                     |
| MAD4487 | <i>pyrG89, sltB53, biA1, nkuAΔ::BAR(?), sltA::ha<sub>3</sub>::pyrG<sup>Af</sup>, pantoB100</i>                                                                                           | This work                     |
| MAD4510 | <i>pyrG89, sltB<sup>692-1272</sup>::myc<sub>3</sub>::pyrG<sup>Af</sup>, pabaB22, nkuAΔ::argB (argB2), riboB2/ pyrG89, sltB53::gfp::pyrG<sup>Af</sup>, biA1, nkuAΔ::BAR(?), pantoB100</i> | This work                     |
| MAD4511 | <i>pyrG89, sltB<sup>692-1272</sup>::myc<sub>3</sub>::pyrG<sup>Af</sup>, pabaB22, nkuAΔ::argB (argB2), riboB2/ pyrG89, sltB53::gfp::pyrG<sup>Af</sup>, biA1, nkuAΔ::BAR(?), pantoB100</i> | This work                     |
| MAD4519 | <i>yA2, pyroA4, pantoB100/ pyrG89, sltB53::gfp::pyrG<sup>Af</sup>, biA1, nkuAΔ::BAR(?), pantoB100</i>                                                                                    | This work                     |
| MAD4520 | <i>yA2, pyroA4, pantoB100/ pyrG89, sltB53::gfp::pyrG<sup>Af</sup>, biA1, nkuAΔ::BAR(?), pantoB100</i>                                                                                    | This work                     |
| MAD4581 | <i>pyrG89, sltB<sup>1-590+TGA</sup>::gfp::riboB<sup>Af</sup>, pabaB22, nkuAΔ::argB (argB2), sltA::ha<sub>3</sub>::pyrG<sup>Af</sup>, riboB2</i>                                          | This work                     |
| MAD4661 | <i>pyrG89, thiA<sup>P</sup>::sltA<sup>400-698</sup>::ha<sub>3</sub>::pyrG<sup>Af</sup>, pabaB22, nkuAΔ::argB</i>                                                                         | This work                     |

|         |                                                                                                                                                                 |                      |
|---------|-----------------------------------------------------------------------------------------------------------------------------------------------------------------|----------------------|
|         | <i>(argB2), riboB2</i>                                                                                                                                          |                      |
| MAD4731 | <i>pyrG89, sltB<sup>H1033A</sup>::gfp::riboB<sup>Af</sup>, pabaB22, nkuAΔ::argB (argB2), sltA::ha<sub>3</sub>::pyrG<sup>Af</sup>, riboB2</i>                    | This work            |
| MAD4733 | <i>pyrG89, sltB::gfp::riboB<sup>Af</sup>, thiA<sup>P</sup>::sltA<sup>400-698</sup>::ha<sub>3</sub>::pyrG<sup>Af</sup>, pabaB22, nkuAΔ::argB (argB2), riboB2</i> | This work            |
| MAD4760 | <i>pyrG89, sltB<sup>S1033A</sup>::gfp::riboB<sup>Af</sup>, pabaB22, nkuAΔ::argB (argB2), sltA::ha<sub>3</sub>::pyrG<sup>Af</sup>, riboB2</i>                    | This work            |
| MAD4784 | <i>hypA::ha<sub>3</sub>::pyrG<sup>Af</sup>, pyrG89, pyroA4, nkuAΔ::BAR,</i>                                                                                     | Pinar et al., (2015) |
| MAD4819 | <i>pyrG89, sltBΔ::riboB<sup>Af</sup>, pabaB22, thiA<sup>P</sup>::sltA<sup>400-698</sup>::ha<sub>3</sub>::pyrG<sup>Af</sup>, nkuAΔ::argB (argB2), riboB2</i>     | This work            |
| MAD4899 | <i>pyrG89, gfp::sltB::myc<sub>3</sub>::pyrG<sup>Af</sup>, pabaB22, nkuAΔ::argB (argB2), riboB2</i>                                                              | This work            |
| MAD4965 | <i>nkuAΔ::argB (argB2), sltAΔ::pyrG<sup>Af</sup>, riboB2</i>                                                                                                    | This work            |
| MAD5268 | <i>pyrG89, sltB<sup>1-477+TGA</sup>::gfp::riboB<sup>Af</sup>, pabaB22, nkuAΔ::argB (argB2), sltA::ha<sub>3</sub>::pyrG<sup>Af</sup>, riboB2</i>                 | This work            |
| MAD5269 | <i>pyrG89, sltB<sup>1-536+TGA</sup>::gfp::riboB<sup>Af</sup>, pabaB22, nkuAΔ::argB (argB2), sltA::ha<sub>3</sub>::pyrG<sup>Af</sup>, riboB2</i>                 | This work            |
| MAD5355 | <i>sltB56::gfp::riboB<sup>Af</sup>, nkuAΔ::BAR(?), nkuAΔ::argB+(?), sltA::ha<sub>3</sub>::pyrG<sup>Af</sup>, riboB2</i>                                         | This work            |
| MAD5384 | <i>sltB56<sup>TGA</sup>::gfp::riboB<sup>Af</sup>, nkuAΔ::BAR(?), nkuAΔ::argB+(?), sltA::ha<sub>3</sub>::pyrG<sup>Af</sup>, riboB2</i>                           | This work            |
| MAD5411 | <i>pyrG89, pyroA4, pyroA<sup>Af</sup>::alca<sup>P</sup>::sltA, nkuAΔ::argB (argB2)</i>                                                                          | This work            |
| MAD5419 | <i>pyrG89, sltBΔ::pyrG<sup>Af</sup>, pyroA4, pyroA<sup>Af</sup>::alca<sup>P</sup>::sltA, nkuAΔ::argB (argB2)</i>                                                | This work            |
| MAD5423 | <i>inoB2, nkuAΔ::BAR?, sltA114, riboB2</i>                                                                                                                      | This work            |

---

BAR, herbicide bialaphos resistance gene from *Streptomyces hygroscopicus*.

Supplemental Table S2

| Primer                  | Sequence (5' → 3')                                           | Target                                                                          |
|-------------------------|--------------------------------------------------------------|---------------------------------------------------------------------------------|
| sltB SMP1               | CGAGTCGTCTCCGGTGTGCGCCAAGA<br>CCGGTCGCCTCAAACAATGCTCT        | Amplification of <i>pyrG<sup>Af</sup>/riboB<sup>Af</sup></i> SM*                |
| sltB GFP2               | GCACAGTGGACGGGGTAAGGTGAG<br>TCTGAGAGGAGGCACTGATGC            | Amplification of <i>pyrG<sup>Af</sup>/riboB<sup>Af</sup></i> SM                 |
| sltB GSP3               | TCACCTTACCCCGTCCACTGTGC                                      | <i>sltB</i> terminator                                                          |
| sltB GSP4               | CGAAAGAAGCTCTACATTGTCCACG<br>AGGAT                           | <i>sltB</i> terminator                                                          |
| sltB gfp GSP1           | GCCTTCATGAATGAAGAACATCTCCC<br>TC                             | <i>sltB</i> ORF for epitope tagging at C-terminus                               |
| sltB gfp GSP2           | AGCAAGCTGTCTTCCAGACTGCGAC<br>C                               | <i>sltB</i> ORF for epitope tagging at C-terminus                               |
| sltB gfp GFP1           | GGTCGCAGTCTGGAAAGACAGCTTG<br>CTGGAGCTGGTGCAGGCGCTGGAGC<br>C  | Amplification of epitopes for tagging at C-terminus of <i>sltB</i>              |
| sltA SMP1               | CGGACATTAGGGACCGTCCATCACC<br>GGTCGCCTCAAACAATGC              | Amplification of <i>pyrG<sup>Af</sup></i> or <i>riboB<sup>Af</sup></i> SM       |
| SltB met                | CCAAGATGTCCGTACTCCCGCACCAT<br>GG                             | <i>sltB</i> ORF at initiation Met to construct truncated forms                  |
| sltB delec COOH GSP2    | GTCATCAAATGGCTGGGTGCGAAAGG                                   | <i>sltB</i> ORF to construct truncated forms                                    |
| sltB delec COOH GFP1    | CCTTTCGACCCAGCCATTTGATGACG<br>GAGCTGGTGCAGGCGCTGGAGC         | Amplification of epitopes for tagging SltB truncated forms at C-terminus        |
| sltB delec NH met compl | CGTCTCCGGTGTGCGCCAAGATGAAG<br>ATCGGGCTTGAAGAAAAAGGCTGA<br>GG | <i>sltB</i> ORF to construct truncated forms                                    |
| sltB delec NH met       | TTCTTCAAGCCCGATCTTCATCTTGG<br>CGACACCGGAGACG                 | <i>sltB</i> ORF to construct truncated forms                                    |
| sltA met200             | CGGACATTAGGGACCGTCCATCATG<br>GATGCCCAAAGCAC                  | <i>sltA</i> ORF to construct truncated form starting at Met200                  |
| sltA arg331             | CGGACATTAGGGACCGTCCATCATG<br>CACGAGGCTGACG                   | <i>sltA</i> ORF to construct truncated form starting at Arg331                  |
| SltBmyc BamHI sense     | GCGGATCCATGTCCGTACTCCC                                       | <i>alcA<sup>P</sup></i> -SltB-Myc plasmid, harbors BamHI restriction site       |
| SltBmyc Xmal antisense  | CCCCCGGGTCAATTAAGATCCTCCT<br>CGG                             | <i>alcA<sup>P</sup></i> -SltB-Myc plasmid, harbors Xmal restriction site        |
| sltA met                | ATGAGTCCAGCACAAGACTCTG                                       | Fusion of <i>sltA</i> ORF to <i>thiA<sup>P</sup></i>                            |
| sltA stop               | GCATTGTTTGAGGCGACCGGTTTAG<br>AGACCACCAGGGCCGGGGT             | Fusion of <i>sltA</i> ORF to <i>thiA<sup>P</sup></i>                            |
| sltA SMP1b              | ACCGGTCGCCTCAAACAATGC                                        | Amplification of SM for tagging SltA in <i>thiA<sup>P</sup>::sltA</i> construct |
| thiA-SltAprom           | CGGACATTAGGGACCGTCCATCACC<br>TGGCACCTACAGAAGAATCC            | Fusion of <i>sltA</i> and <i>thiA</i> promoters                                 |
| thiA-SltAgen            | CAGAGTCTGTGCTGGACTCATATG<br>GACTCAGTTCAATGGTTCCG             | Fusion of <i>sltA</i> ORF to <i>thiA<sup>P</sup></i>                            |
| thiA-sltAgen comp       | CGAACCATTGAACTGAGTCCATATG<br>AGTCCAGCACAAGACTCTG             | Fusion of <i>sltA</i> ORF to <i>thiA<sup>P</sup></i>                            |
| sltA gsp1               | GCATCGTAGTGTAGCTGTGC                                         | Amplification of <i>sltA</i> promoter                                           |

| Primer                  | Sequence (5' → 3')                                          | Target                                                                    |
|-------------------------|-------------------------------------------------------------|---------------------------------------------------------------------------|
| sltA gsp5               | GCTCAGAGAGTCCATTGTCATGC                                     | <i>sltA</i> ORF, epitope tagging at C-terminus, fusion cassette           |
| sltA gsp6               | GAGACCACCAGGGCCGG                                           | <i>sltA</i> ORF, epitope tagging at C-terminus, fusion cassette           |
| sltA gsp6'              | CCGGCCCTGGTGGTCTCGGAGCTGG<br>TGCAGGCGCTGGAGC                | Amplification of epitopes for tagging SltA at C-terminus, fusion cassette |
| sltA gsp3'              | CCACCAAATGTGACGAGACTGTCTG<br>AGAGGAGGCACTGATGCG             | Amplification of epitopes for tagging SltA at C-terminus, fusion cassette |
| sltA gsp3               | TCTCGTCACATTTGGTGG                                          | <i>sltA</i> terminator, epitope tagging at C-terminus, fusion cassette    |
| sltA gsp4               | GCTACGGATGCTGACTCC                                          | <i>sltA</i> terminator, epitope tagging at C-terminus, fusion cassette    |
| sltB 477 gsp2           | AGGACGACGGAGGTTTTAGTCAC                                     | <i>sltB</i> ORF, to construct SltB <sup>1-477</sup> -GFP                  |
| sltB 477 gfp1           | GTGACTGAAAACCTCCGTCGTCCTG<br>GAGCTGGTGCAGGCGCTGGAGC         | <i>sltB</i> ORF, to construct SltB <sup>1-477</sup> -GFP                  |
| sltAmet400              | CGAACCATTGAACTGAGTCCATATG<br>GCCCCTCGCAAGAAGAATGC           | <i>sltA</i> ORF, to construct SltA <sup>400-698</sup> truncated form      |
| sltB-R2                 | TGAGAAAGGGTCGTCGTGGGG                                       | <i>sltB</i> , PCR amplification and sequencing                            |
| sltB-R1                 | CATGTGATGTACTGTCATACCG                                      | <i>sltB</i> , PCR amplification and sequencing                            |
| sltB-F1                 | AGTCCTGGCGGTGATCTGGGC                                       | <i>sltB</i> , PCR amplification and sequencing                            |
| sltB 590 stop           | CCTTTGACCCAGCCATTTGATGACT<br>GAGGAGCTGGTGCAGGCGCTGGAG<br>C  | <i>sltB</i> ORF, to construct SltB <sup>1-590</sup> truncated form        |
| sltB mut His1033        | CACGACAGGGCATCAAGGCTGAAAT<br>CGACTGGGC                      | <i>sltB</i> , mutagenesis of His1033 codon to Ala codon                   |
| sltB mut His31033 compl | AGTCGATTTAGCCTTGATGCCCTGT<br>CGTGTCCAGC                     | <i>sltB</i> , mutagenesis of His1033 codon to Ala codon                   |
| sltB mut Ser1142        | GAGTTCCCGGTGATGCTGGCGCTTG<br>GGTCTTTG                       | <i>sltB</i> , mutagenesis of S1142 codon to Ala codon                     |
| sltB mut Ser1142 compl  | AAGACCCAAGCGCCAGCATCACCGG<br>GAACTCCG                       | <i>sltB</i> , mutagenesis of S1142 codon to Ala codon                     |
| sltB gfp SMP2           | CCCCATGGTGCGGGAGTACGGACAT<br>TTTGTATAGTTCATCCATGCCATGT      | <i>sltB</i> ORF, for epitope tagging at N-terminus                        |
| sltB inicio             | ATGTCCGTACTCCCGCACCATGGGG                                   | <i>sltB</i> ORF, for epitope tagging at N-terminus                        |
| sltB gfp SMP1*          | CGAGTCGTCTCCGGTGTGCGCAAGA<br>TGGGAGCTGGTGCAGGCGCTGGAG<br>CC | <i>sltB</i> ORF, for epitope tagging at N-terminus                        |
| sltB477 stop            | GAAAACCTCCGTCGTCCTTGAGGAG<br>CTGGTGCAAG                     | <i>sltB</i> ORF, to construct SltB <sup>1-477+TGA</sup> -GFP fusion       |
| sltB56 mutag            | GAAAACCTCCGTCGTCCTTGACTTAC<br>CTCCTTCGCTCAGT                | Mutagenesis of <i>sltB56</i> TAA codon to TGA codon                       |
| sltB56 mutag compl      | ACTGAGCGAAGGAGGTAAGTCAAG<br>GACGACGGAGGTTTTTC               | Mutagenesis of <i>sltB56</i> TAA codon to TGA codon                       |
| sltA prom pyro          | CGGACATTAGGGACCGTCCATCTGG                                   | Fusion of <i>sltA</i> promoter to A.                                      |

| <b>Primer</b>         | <b>Sequence (5' → 3')</b>  | <b>Target</b>                                 |
|-----------------------|----------------------------|-----------------------------------------------|
| <b>sltA prom alcA</b> | TATCATGGTTGTTGGGTC         | <i>fumigatus pyroA<sup>Af</sup></i> SM        |
|                       | CAGAGTCTTGTGCTGGACTCATCCCG | Fusion of <i>sltA</i> promoter to <i>alcA</i> |
|                       | GTACCGCTAATTAAGTGA         | promoter                                      |

\* SM: Selectable Marker

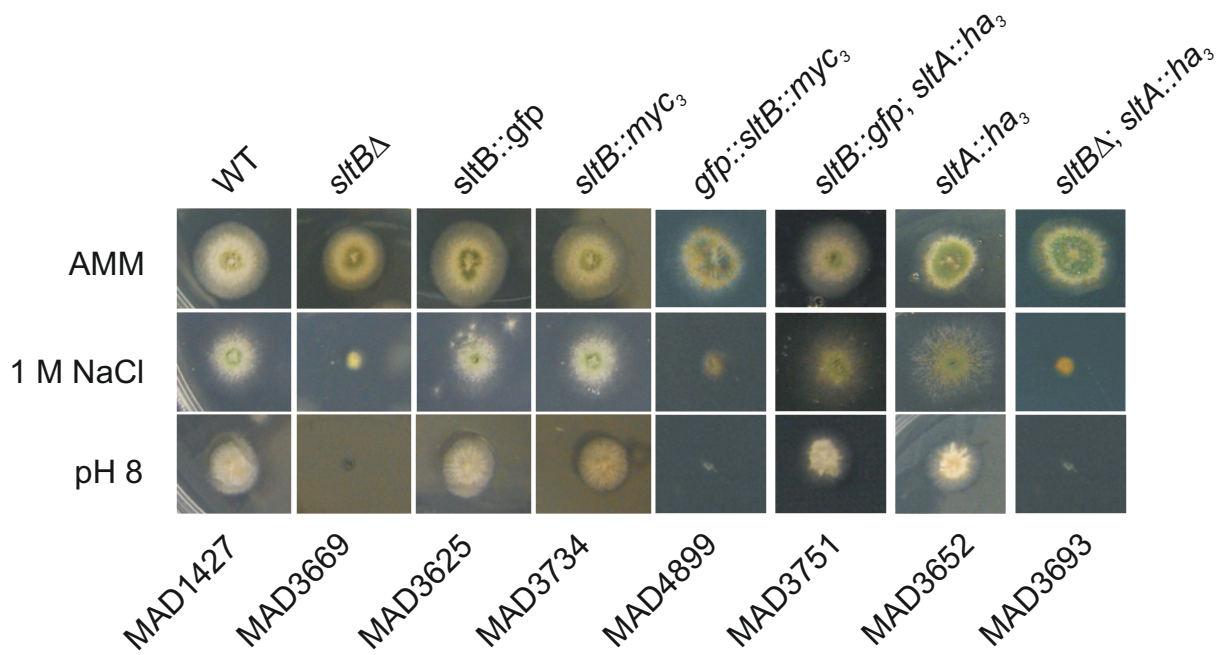

Supplemental Figure S1. Growth tests of strains expressing tagged versions of SlfB and/or SlfA. AMM is the control minimal medium. Tolerance to sodium stress (addition of 1 M NaCl to AMM) or to alkaline pH (pH 8, containing additionally 100 mM Na<sub>2</sub>HPO<sub>4</sub>) was tested. Conidiospores were point inoculated and colonies grown for two days at 37° C. Note that the sensitivity to high sodium concentrations (1 M Na<sup>+</sup>) or alkaline pH (pH 8) of null *sltB* strains is independent of HA<sub>3</sub>-tagging of SlfA.



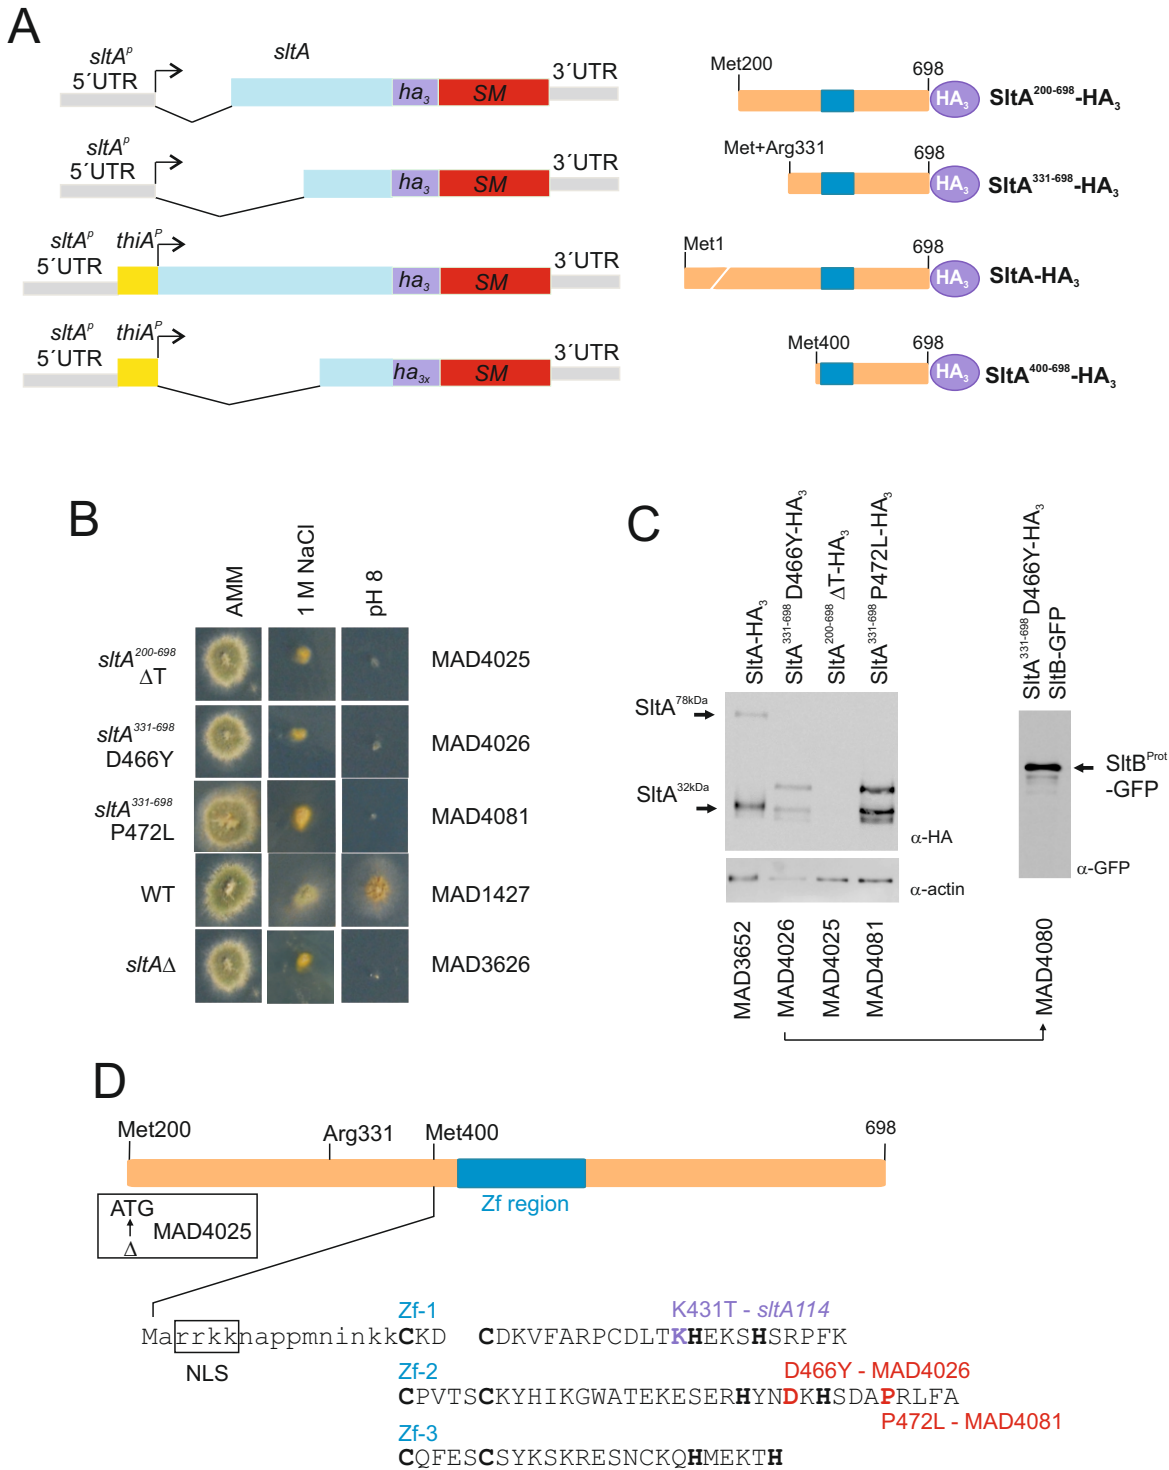

Supplemental Figure S2. Construction of truncated SlitA versions putatively mimicking SlitA32kDa. (A) Schematic representation of the transcription and translation products generated by gene replacement at the *sltA* locus and allowing expression by the endogenous *sltA* promoter or the conditional *thiA*<sup>P</sup> promoter. As control, a conditional allele expressing the full length SlitA-HA<sub>3</sub> fusion was constructed. SM indicates selectable marker. (B) Growth tests of selected transformants obtained with DNA cassettes for the generation of alleles expressing SlitA<sup>200-698</sup> or SlitA<sup>331-698</sup>. Transformants have a loss of function phenotype comparable to a null *sltA* strain. (C) Western blot showing the detectable fragments of SlitA from transformants shown in panel B. Immuno-detection of actin is shown as a loading control. (D) Diagram representing the expressed SlitA fusions and the mutations occurring in transformants. Limits of the DNA binding domain consisting of three classical C<sub>2</sub>H<sub>2</sub> zinc fingers are shown. Mutational substitutions are indicated: those occurring during the construction of strains expressing the SlitA<sup>331-698</sup> form are shown in red and the change due to *sltA*114 mutation, selected as a suppressor of the null *vps3* allele ((Mellado et al., 2015), see Fig 10) is shown in blue. A putative nuclear localization signal, NLS, is indicated.

A

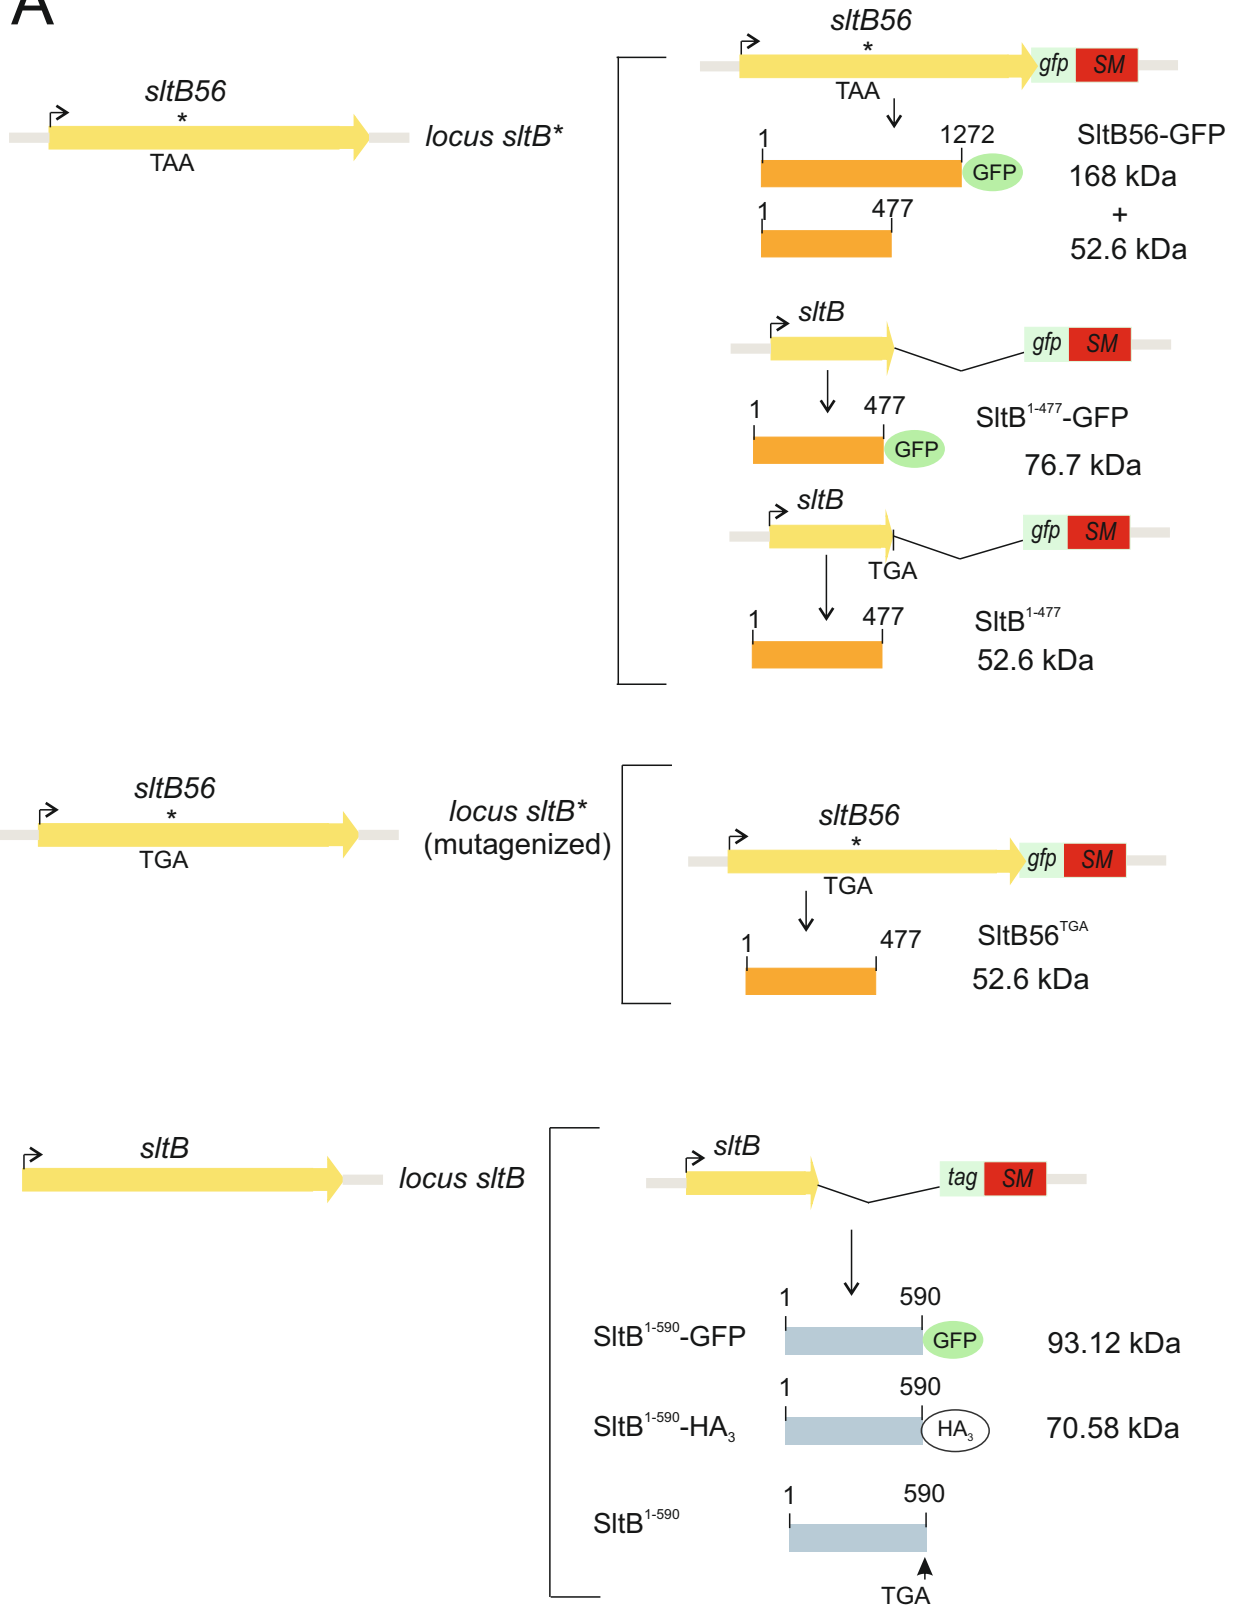

B

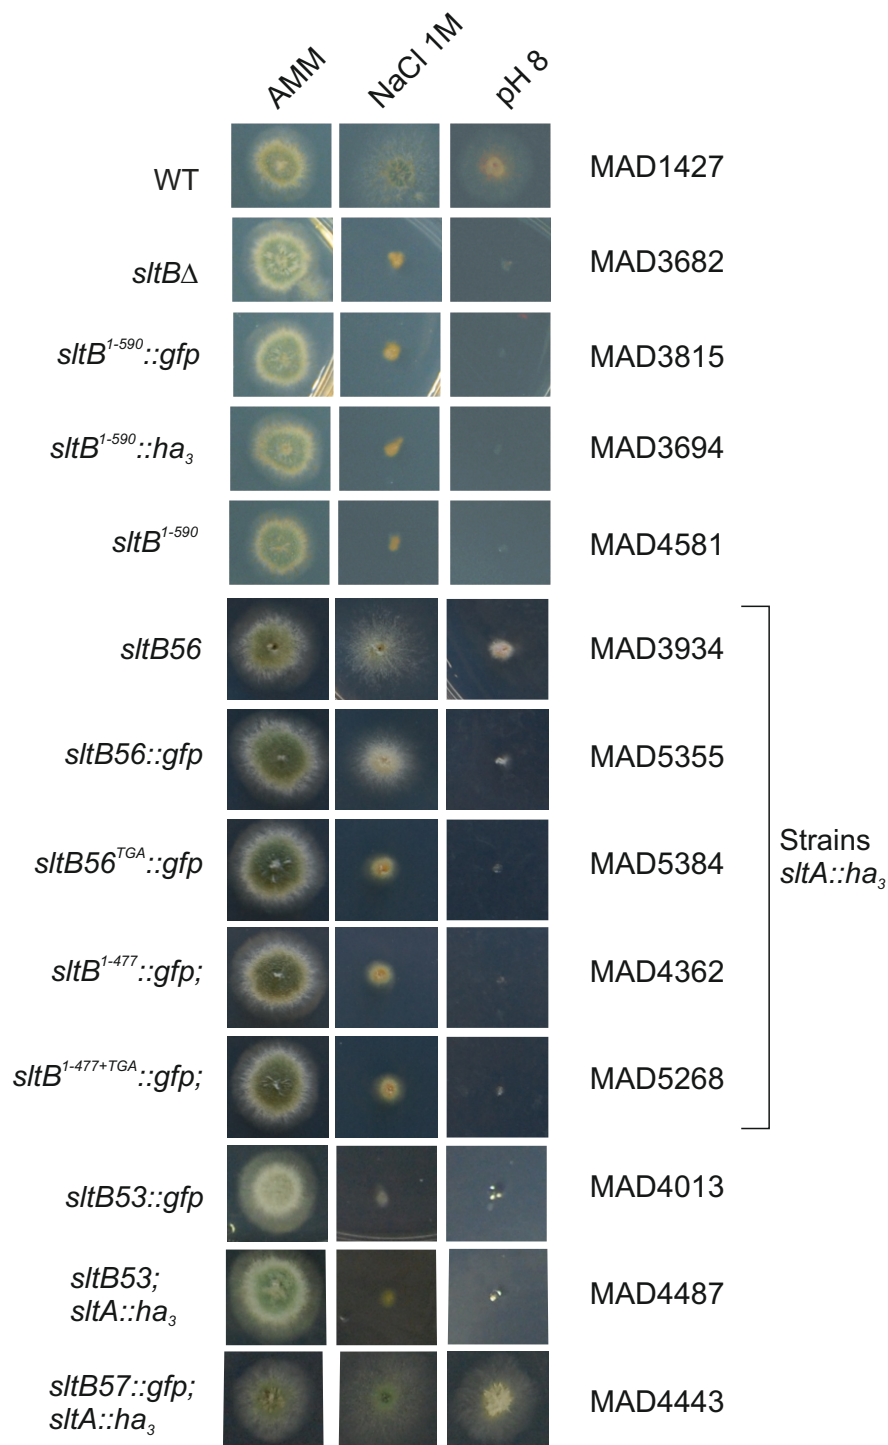

Supplemental Figure S3. Construction and phenotypic analysis of strains expressing mutant forms of SltB. (A) Schematic representation of the alleles generated by reverse genetics to study the roles of the Psk and protease domains of SltB. SM indicates selectable marker. (B) Growth tests on AMM to determine the responses of various *sltB* mutant strains to an elevated concentration of sodium (1 M NaCl) or alkalinity (pH 8). Colonies were photographed after two days' incubation at 37°C.

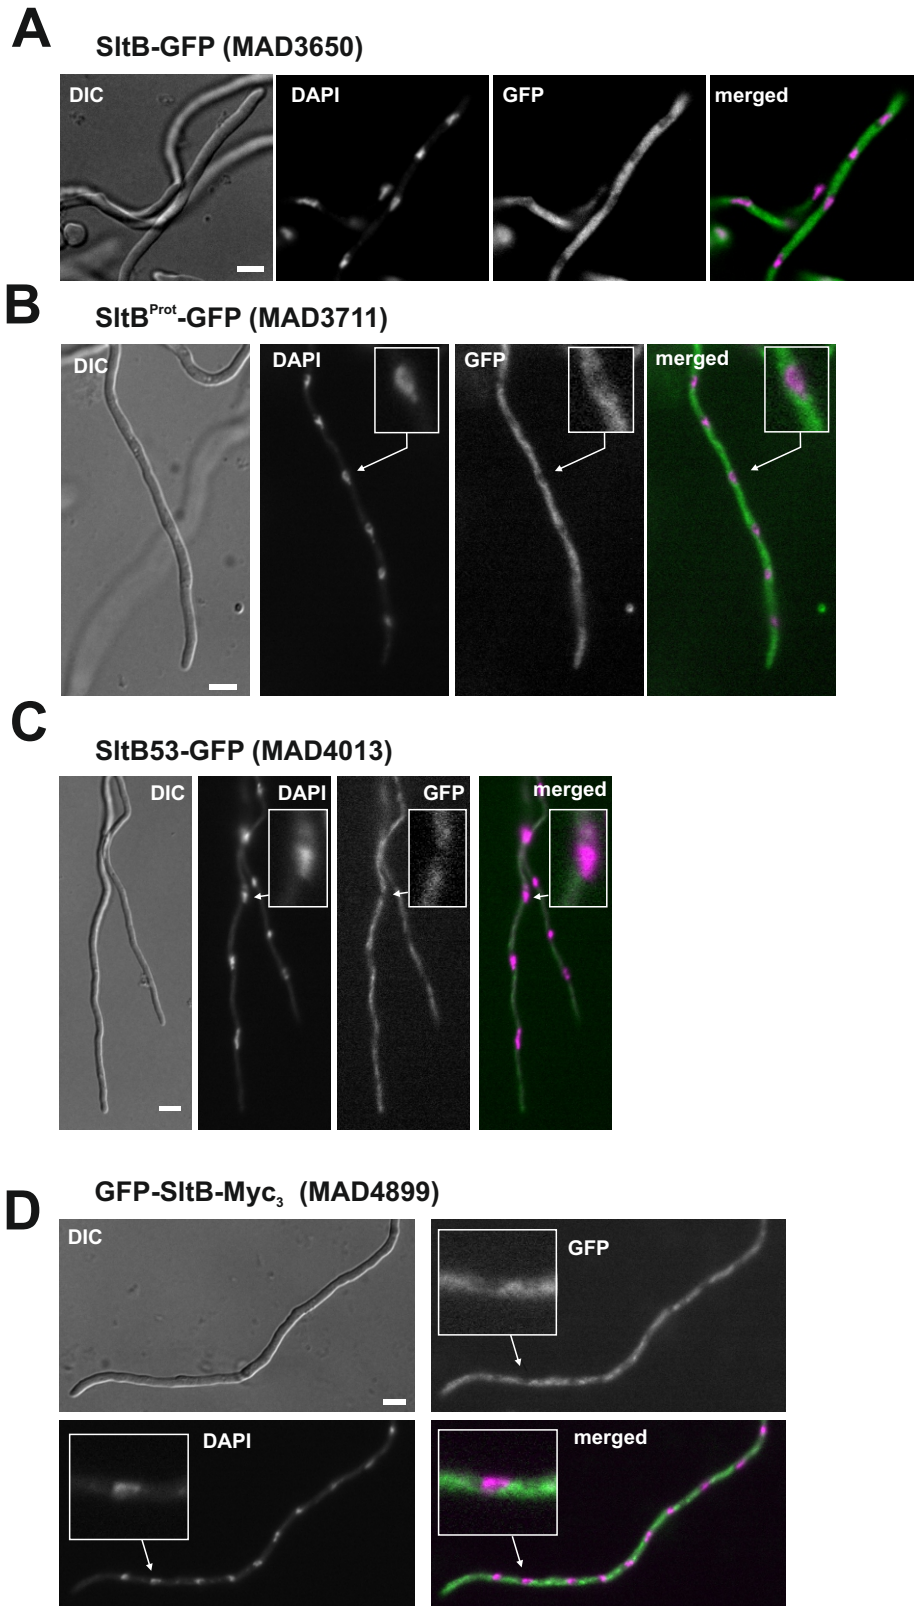

Supplemental Figure S4. Absence of nuclear SlitB protein. DAPI staining of nuclei required fixing of cells and this process reduced detection of fluorescence of SlitB-GFP chimaeras (compare with Fig. 7). In all cases SlitB-GFP fusions were cytoplasmic and excluded from nuclei. A representative hypha from each strain is shown, A) MAD3650, B) MAD3711, C) MAD4013 and D) MAD4899. Merged images of GFP (green) and DAPI (magenta) fluorescence are shown. Magnification of a nucleus is shown for each hypha. Bar = 5  $\mu$ m

**A**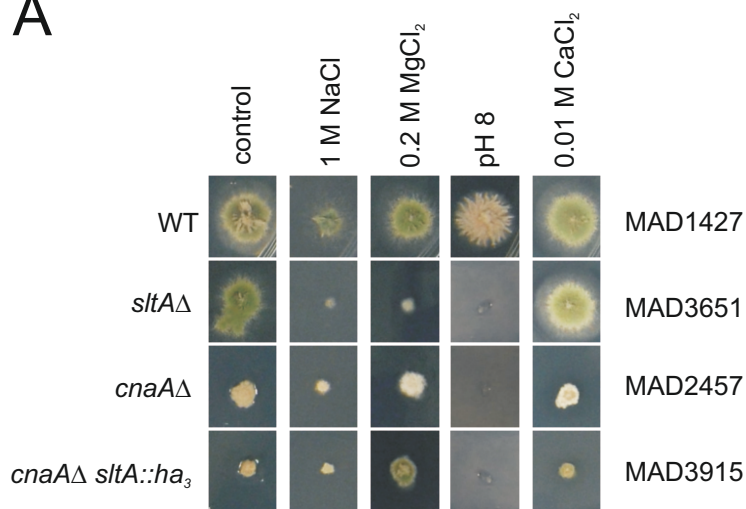**B**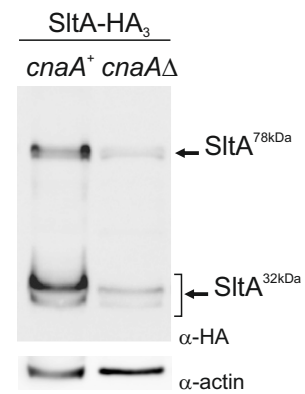

Supplemental Figure S5: Absence of calcineurin activity reduces levels of all forms of SltA. A) Phenotypic analysis of null *cnaA* strain expressing the SltA-HA<sub>3</sub> tagged protein. Strain MAD3915 was selected from progeny of a cross between strains MAD3652 and MAD2457, (see Supplemental Table S1). Strain MAD3915 showed identical morphology phenotype, compact morphology and sensitivity to sodium (1 M NaCl) and alkalinity (pH 8), to that displayed by parental strain MAD2457 (Soriani et al., 2008), both lacking the activity of calcineurin catalytic subunit. B) Detection of SltA-HA<sub>3</sub> forms in *cnaA* null and WT backgrounds. Notably, all SltA forms were detected in both strains without alteration in their electrophoretic mobilities. Relative to actin, levels were reduced for the three SltA-HA<sub>3</sub> forms.

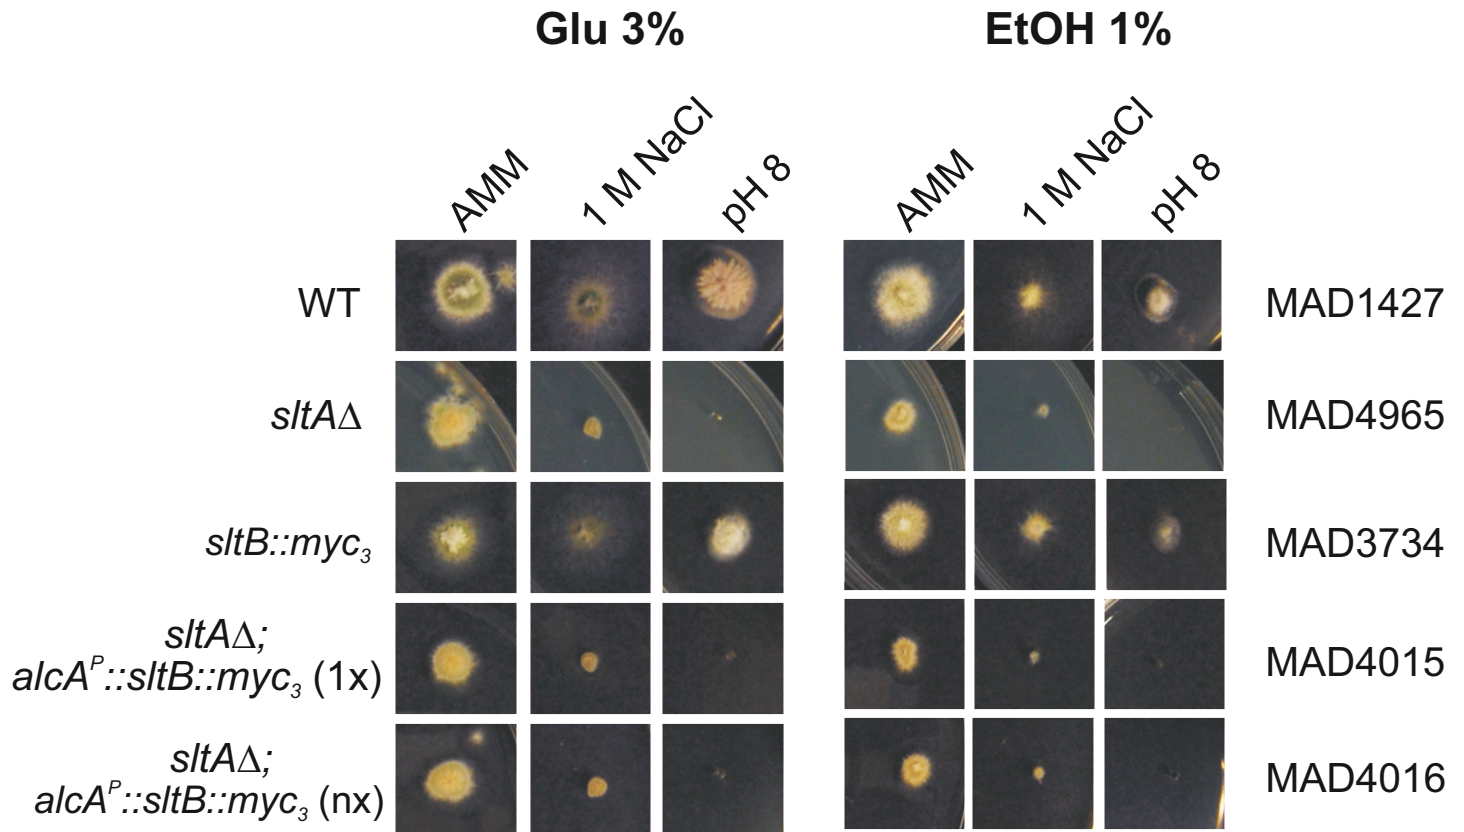

Supplemental Figure S6. Phenotypic analyses of strains carrying the *alcA*-promoter-driven *sltB* coding region. Growth tests of gene replacement strains carrying a single copy (1x) or more than three copies (nx) of the *alcA*<sup>P</sup>::*sltB::myc*<sub>3</sub> fusion construct. 3% glucose as carbon source is a non-inducing, repressing condition for expression for the *alcA* promoter whereas 1% ethanol as carbon source is an inducing, derepressing condition. Point inoculated colonies were grown for 48 h at 37°C.
